# Supplementary material for: Transcriptional and Post-Transcriptional Modulation of SPI1 and SPI2 Expression by ppGpp, RpoS and DksA in Salmonella enterica sv Typhimurium
Source: PLoS One. 2015 Jun 3;10(6):e0127523. doi: 10.1371/journal.pone.0127523 (PMC4454661; doi:10.1371/journal.pone.0127523)
Supplement: S2 Table — (XLSX) [file pone.0127523.s006.xlsx]

## Sheet: Table S2
Data for Fig. 1A									Data for Fig. 1B		LLP				ESP				MSP				LSP					Data for Fig. 1C											Data for Fig. 1D
Gene name	Synonym	LLP/ESP fold expression ratio	p-value	LLP/MSP fold expression ratio	p-value	LLP/LSP fold expression ratio	p-value		Gene name	Synonym	P/WT fold expression ratio	p-value	R/WT fold expression ratio	p-value	P/WT fold expression ratio	p-value	R/WT fold expression ratio	p-value	P/WT fold expression ratio	p-value	R/WT fold expression ratio	p-value	P/WT fold expression ratio	p-value	R/WT fold expression ratio	p-value		Gene name	Synonym	D/WT at LLP fold expression ratio	p-value	D/WT at ESP fold expression ratio	p-value	D/WT at MSP fold expression ratio	p-value	D/WT at LSP fold expression ratio	p-value		Gene name	Synonym	R/WT fold expression ratio	p-value	P/WT fold expression ratio	p-value	RP/WT fold expression ratio	p-value	D/WT fold expression ratio	p-value	P/WT fold expression ratio
avrA	STM2865	1.20177	0.193	1.2766	0.19	0.89738	0.784		avrA	STM2865	0.350123	0.00171	0.763778	0.112	0.341458	0.00957	1.24854	0.188	0.423428	0.0283	1.37347	0.278	0.481761	0.00697	0.86604	0.0555		avrA	STM2865	0.939529	0.838	1.34313	0.305	0.725155	0.0541	0.723591	0.628		avrA	STM2865	0.86604	0.0555	0.423428	0.00697	0.48971	0.00181	0.723591	0.628	0.323792
hilA	STM2876	1.31282	0.0907	3.36135	0.0297	1.2472	0.355		hilA	STM2876	0.953289	0.382	1.18065	0.452	1.12774	0.608	1.43994	0.0962	0.800056	0.0974	1.80194	0.0696	0.701955	0.0306	2.59636	0.0318		hilA	STM2876	1.354	0.857	1.08345	0.0676	2.04512	0.0502	1.25394	0.823		hilA	STM2876	2.59636	0.0318	0.800056	0.0306	0.485566	0.000805	1.25394	0.823	0.730622
hilC	STM2867	1.18715	0.173	11.6516	0.0405	0.141689	0.376		hilC	STM2867	0.582346	0.00219	0.986757	0.889	0.959542	0.358	1.70286	0.0512	0.184747	0.0283	1.02736	0.672	0.630153	0.0744	1.63625	0.00732		hilC	STM2867	0.882981	0.792	1.87324	0.0142	1.04681	0.884	0.948813	0.708		hilC	STM2867	1.63625	0.00732	0.184747	0.0744	0.134884	0.00259	0.948813	0.708	0.387669
hilD	STM2875	2.4205	0.0041	2.94432	0.00906	0.837745	0.106		hilD	STM2875	0.591373	6.48e-05	1.83464	0.00246	0.641396	0.205	1.02546	0.843	0.708764	0.232	2.16195	0.0696	0.60808	0.0471	1.96701	0.00688		hilD	STM2875	1.74243	0.857	1.95433	0.0252	4.71568	0.0281	6.93327	0.0386		hilD	STM2875	1.96701	0.00688	0.708764	0.0471	0.241902	0.00018	6.93327	0.0386	1.76699
iacP	STM2881	2.62628	0.000985	2.1346	0.000956	0.926726	0.0263		iacP	STM2881	0.609504	0.00396	0.828071	0.147	0.379882	0.00623	1.13026	0.242	0.274092	0.0283	2.01751	0.123	0.691747	0.322	1.75071	0.00685		iacP	STM2881	0.525302	0.229	0.419491	0.125	1.53065	0.0691	7.50578	0.0155		iacP	STM2881	1.75071	0.00685	0.274092	0.322	0.260171	0.00238	7.50578	0.0155	0.672698
iagB	STM2877	2.80012	0.00618	1.61184	0.0148	0.515785	0.135		iagB	STM2877	0.339189	0.000406	0.993097	0.919	0.346231	0.0575	0.642166	0.248	0.434246	0.222	0.927057	0.918	0.608902	0.0594	1.16919	0.0256		iagB	STM2877	2.49469	0.239	3.40828	0.024	4.73437	0.011	6.70291	0.0104		iagB	STM2877	1.16919	0.0256	0.434246	0.0594	0.201513	0.00647	6.70291	0.0104	0.794443
invA	STM2896	2.60129	0.00618	1.02676	0.0122	0.867821	0.135		invA	STM2896	0.3894	0.00178	0.942944	0.617	0.319271	0.0134	0.828079	0.72	0.583967	0.0974	1.81196	0.146	0.60163	0.0044	1.25149	0.0204		invA	STM2896	0.826042	0.838	1.68906	0.203	2.39665	0.0525	2.99142	0.0193		invA	STM2896	1.25149	0.0204	0.583967	0.0044	0.321941	0.00238	2.99142	0.0193	0.418806
invB	STM2895	3.11146	0.00294	3.1032	0.00637	0.439009	0.0683		invB	STM2895	0.244326	0.000469	0.912986	0.919	0.357108	0.0342	0.768186	0.334	0.415277	0.0457	2.23333	0.0708	0.633664	0.029	1.69477	0.00685		invB	STM2895	0.941451	0.792	1.33754	0.207	4.38785	0.00751	9.05663	0.00803		invB	STM2895	1.69477	0.00685	0.415277	0.029	0.101615	0.0003	9.05663	0.00803	0.320474
invC	STM2894	2.92221	0.00258	1.76134	0.00277	0.960574	0.0462		invC	STM2894	0.388549	0.00173	0.99741	0.873	0.324689	0.0307	0.864415	0.843	0.398222	0.0321	1.39704	0.0708	0.418338	0.00211	1.08547	0.0594		invC	STM2894	1.05641	0.857	1.71115	0.024	3.35911	0.0193	4.46986	0.00717		invC	STM2894	1.08547	0.0594	0.398222	0.00211	0.192	0.000209	4.46986	0.00717	0.630832
invE	STM2897	2.20082	0.00258	0.866701	0.00445	0.863868	0.0515		invE	STM2897	0.272361	0.000558	0.981229	0.55	0.314163	0.0171	0.8619	0.289	0.417994	0.0409	1.14498	0.666	0.37298	0.00234	1.09049	0.0213		invE	STM2897	0.705645	0.602	1.62525	0.0142	4.50757	0.0499	8.30739	0.00717		invE	STM2897	1.09049	0.0213	0.417994	0.00234	0.305912	0.0014	8.30739	0.00717	0.363894
invF	STM2899	2.99747	0.00208	1.9418	0.00158	1.77678	0.0285		invF	STM2899	0.544199	0.000452	1.16348	0.0254	0.524681	0.134	0.832313	0.764	1.06558	0.859	2.04575	0.0696	0.460168	0.0336	0.93986	0.0791		invF	STM2899	1.14749	0.857	1.4744	0.0142	4.44342	0.00328	4.5778	0.0297		invF	STM2899	0.93986	0.0791	1.06558	0.0336	0.227661	0.00015	4.5778	0.0297	0.687259
invG	STM2898	1.95492	0.000985	1.6287	0.000956	0.81815	0.0263		invG	STM2898	0.533593	0.000558	1.09381	0.214	0.551978	0.0174	0.954956	0.764	0.777124	0.357	1.34125	0.146	0.664209	0.0234	1.33754	0.008		invG	STM2898	0.94696	0.789	1.45322	0.0155	4.98602	0.0199	4.01074	0.00868		invG	STM2898	1.33754	0.008	0.777124	0.0234	0.325896	0.000681	4.01074	0.00868	0.538339
invH	STM2900	1.05066	0.701	1.65229	0.235	0.520623	0.983		invH	STM2900	0.450124	0.000496	1.09105	0.617	1.36654	0.347	1.16161	0.503	1.10788	0.669	1.28753	0.356	0.603406	0.0212	1.29102	0.0102		invH	STM2900	1.76844	0.463	1.64772	0.0272	2.91744	0.00751	6.23597	0.00803		invH	STM2900	1.29102	0.0102	1.10788	0.0212	0.509308	0.00496	6.23597	0.00803	0.582376
invI	STM2893	1.19255	0.193	1.59337	0.146	0.56097	0.784		invI	STM2893	0.31586	0.000552	0.778636	0.189	0.509155	0.0307	0.997394	0.928	0.535656	0.102	1.42825	0.195	0.493801	0.016	1.0236	0.0624		invI	STM2893	0.878753	0.602	1.25946	0.125	4.03033	0.0251	4.38182	0.00803		invI	STM2893	1.0236	0.0624	0.535656	0.016	0.370443	0.00104	4.38182	0.00803	0.760548
invJ	STM2892	1.52929	0.187	2.39825	0.0659	0.381718	0.68		invJ	STM2892	0.732464	0.761	1.52811	0.658	0.289779	0.0307	1.15638	0.503	0.38129	0.0283	2.66831	0.0556	0.417578	8.05e-05	1.24543	0.0213		invJ	STM2892	0.578534	0.103	1.0325	0.657	5.88877	0.0251	8.20546	0.0155		invJ	STM2892	1.24543	0.0213	0.38129	8.05e-05	0.188033	0.000137	8.20546	0.0155	0.551049
orgA	STM2869	1.93998	0.00217	3.15144	0.00228	0.550285	0.0314		orgA	STM2869	0.343778	8.62e-05	1.11339	0.0254	0.421286	0.0174	1.02871	0.484	0.333657	0.0283	1.37808	0.259	0.428074	0.00234	1.25259	0.0155		orgA	STM2869	1.61827	0.323	2.25621	0.0373	3.02904	0.0119	6.94008	0.0463		orgA	STM2869	1.25259	0.0155	0.333657	0.00234	0.193327	0.000805	6.94008	0.0463	0.254923
prgH	STM2874	1.53039	0.000266	1.79698	0.000745	0.805092	0.0159		prgH	STM2874	0.289771	0.000208	1.00259	0.919	0.413745	0.0135	1.05058	0.0962	0.745452	0.497	1.88004	0.103	0.40008	0.00234	1.23074	0.0213		prgH	STM2874	1.45869	0.792	1.64371	0.0534	6.05323	0.00751	16.5862	0.0297		prgH	STM2874	1.23074	0.0213	0.745452	0.00234	0.372183	0.000829	16.5862	0.0297	0.29931
prgI	STM2873	2.35011	0.00144	3.40316	0.00152	1.27894	0.0263		prgI	STM2873	0.394457	0.00718	1.11564	0.595	0.296735	0.0148	0.916433	0.154	0.597626	0.302	1.93942	0.0511	0.416181	0.00533	0.978074	0.0935		prgI	STM2873	1.36917	0.792	1.94503	0.144	6.34411	0.00751	14.2438	0.0155		prgI	STM2873	0.978074	0.0935	0.597626	0.00533	0.148165	0.000137	14.2438	0.0155	0.257275
prgJ	STM2872	2.52102	0.000266	3.26115	0.000745	1.13476	0.0159		prgJ	STM2872	0.339394	0.000987	1.21606	0.179	0.320088	0.0174	0.840348	0.0935	0.542033	0.13	1.6103	0.00394	0.430864	0.102	0.837507	0.0997		prgJ	STM2872	1.55233	0.703	1.8645	0.125	6.8978	0.00751	23.9467	0.00717		prgJ	STM2872	0.837507	0.0997	0.542033	0.102	0.14306	9.65e-05	23.9467	0.00717	0.21879
prgK	STM2871	2.23234	0.00258	3.38066	0.005	0.47348	0.0683		prgK	STM2871	0.247448	0.000624	1.17297	0.478	0.291181	0.0174	0.738754	0.0962	0.515694	0.131	1.39942	0.0708	0.476684	0.0044	1.10271	0.0534		prgK	STM2871	2.0319	0.103	2.27024	0.0142	10.4175	0.00997	29.2287	0.0116		prgK	STM2871	1.10271	0.0534	0.515694	0.0044	0.170172	9.65e-05	29.2287	0.0116	0.356586
sicA	STM2886	8.22506	9.78e-05	1.72362	0.000174	1.70823	0.0159		sicA	STM2886	0.186197	6.48e-05	0.79215	0.112	0.156046	0.00957	0.614394	0.0955	0.270973	0.0304	4.66856	0.0197	0.31458	0.0044	3.99229	0.00732		sicA	STM2886	0.356281	0.103	0.429785	0.0678	2.6604	0.0541	5.88397	0.0452		sicA	STM2886	3.99229	0.00732	0.270973	0.0044	0.077158	0.000154	5.88397	0.0452	0.0789298
sicP	STM2879	6.1599	0.000985	4.6797	0.000745	0.270018	0.0173		sicP	STM2879	0.505026	0.00109	0.881636	0.168	0.298017	0.0174	1.45942	0.2	0.110182	0.0283	1.55201	0.146	0.917775	0.322	3.50831	0.00685		sicP	STM2879	0.753035	0.585	0.546158	0.137	1.7029	0.112	10.5716	0.015		sicP	STM2879	3.50831	0.00685	0.110182	0.322	0.0866687	0.000463	10.5716	0.015	0.686014
sipA	STM2882	2.4064	0.00338	1.69461	0.00761	0.923074	0.0691		sipA	STM2882	0.196106	0.000406	0.533793	0.112	0.232232	0.00957	1.48401	0.0935	0.275224	0.0283	3.00298	0.0391	0.300356	0.0044	1.36856	0.032		sipA	STM2882	0.271232	0.0639	0.260117	0.0245	1.3442	0.884	4.09501	0.0297		sipA	STM2882	1.36856	0.032	0.275224	0.0044	0.231727	0.00029	4.09501	0.0297	0.176004
sipB	STM2885	5.87034	9.78e-05	5.20747	0.000745	1.06127	0.0159		sipB	STM2885	0.217156	6.48e-05	0.891512	0.415	0.149546	0.00944	1.42092	0.147	0.212224	0.0283	8.11095	0.00128	0.249153	0.000415	3.71282	0.00991		sipB	STM2885	0.310473	0.00106	0.698564	0.0252	2.41669	0.0451	5.05582	0.138		sipB	STM2885	3.71282	0.00991	0.212224	0.000415	0.0586035	1.38e-05	5.05582	0.138	0.168112
sipC	STM2884	7.37775	0.000985	2.19832	0.00126	1.22871	0.0263		sipC	STM2884	0.087779	0.00017	0.69828	0.189	0.067233	0.00623	1.3211	0.141	0.197785	0.0457	5.65668	0.0234	0.234439	0.0044	7.04584	0.00688		sipC	STM2884	0.189136	0.0639	0.340067	0.0187	1.63024	0.112	4.85282	0.173		sipC	STM2884	7.04584	0.00688	0.197785	0.0044	0.0604102	0.000154	4.85282	0.173	0.0413953
sipD	STM2883	3.81691	0.000985	2.11419	0.00116	0.627316	0.0263		sipD	STM2883	0.1867	0.00017	0.786469	0.123	0.188836	0.00957	1.49815	0.0935	0.191287	0.0283	4.46266	0.0125	0.324299	0.000415	2.37993	0.00685		sipD	STM2883	0.261452	0.0293	0.306965	0.0142	1.45428	0.321	5.34932	0.138		sipD	STM2883	2.37993	0.00685	0.191287	0.000415	0.105921	9.65e-05	5.34932	0.138	0.076458
spaP	STM2890	1.98334	0.00742	1.16313	0.019	0.512612	0.152		spaP	STM2890	0.432061	0.00179	0.929075	0.345	0.408807	0.0172	0.9335	0.503	0.22909	0.0385	0.72942	0.702	0.555315	0.0044	1.34867	0.00685		spaP	STM2890	0.573723	0.756	1.25069	0.628	2.77131	0.0119	4.96094	0.00803		spaP	STM2890	1.34867	0.00685	0.22909	0.0044	0.232644	0.00477	4.96094	0.00803	0.510892
spaQ	STM2889	1.2914	0.104	1.59278	0.0377	0.660969	0.376		spaQ	STM2889	1.19961	0.292	0.981683	0.919	1.00477	0.681	1.15031	0.764	0.581548	0.0393	1.00744	0.952	0.939121	0.975	1.06879	0.0337		spaQ	STM2889	0.719606	0.731	1.21063	0.512	1.81046	0.0604	1.49953	0.205		spaQ	STM2889	1.06879	0.0337	0.581548	0.975	0.477705	0.00232	1.49953	0.205	0.466357
spaR	STM2888	1.53113	0.0341	1.05342	0.0204	0.776831	0.271		spaR	STM2888	0.496566	0.0053	0.845489	0.161	0.512446	0.0221	1.00484	0.993	0.388544	0.0283	0.685519	0.195	0.46953	0.00383	0.889417	0.0213		spaR	STM2888	0.57319	0.589	1.11556	0.314	2.05525	0.0251	3.55093	0.0418		spaR	STM2888	0.889417	0.0213	0.388544	0.00383	0.401999	0.00313	3.55093	0.0418	0.827778
spaS	STM2887	1.46724	0.00941	0.855419	0.0204	0.938206	0.233		spaS	STM2887	0.323553	0.00171	0.714084	0.0104	0.472449	0.0172	1.11371	0.764	0.566063	0.0931	1.67204	0.146	0.344579	0.00211	1.08149	0.0684		spaS	STM2887	0.625964	0.323	0.854097	0.203	2.77912	0.0281	3.41971	0.138		spaS	STM2887	1.08149	0.0684	0.566063	0.00211	0.503809	0.00174	3.41971	0.138	0.241145
sprB	STM2866	1.08412	0.579	2.57355	0.201	0.29791	0.891		sprB	STM2866	0.276112	0.00219	0.632516	0.112	0.465331	0.0431	1.93465	0.00548	0.315049	0.102	2.28973	0.0696	0.557026	0.0209	1.54078	0.00991		sprB	STM2866	1.02051	0.792	2.43396	0.0155	1.79147	0.0502	1.5703	0.273		sprB	STM2866	1.54078	0.00991	0.315049	0.0209	0.243309	0.00358	1.5703	0.273	0.397421
sptP	STM2878	3.37414	0.00399	1.46208	0.00795	0.711528	0.0802		sptP	STM2878	0.400895	0.00295	0.706013	0.112	0.362297	0.0197	1.68493	0.126	0.399538	0.0283	4.15556	0.0696	0.424364	0.00587	1.67599	0.00685		sptP	STM2878	0.524347	0.223	0.481276	0.024	2.29174	0.105	7.20471	0.0543		sptP	STM2878	1.67599	0.00685	0.399538	0.00587	0.263405	0.00165	7.20471	0.0543	0.421687
STM2868		1.25174	0.165	2.51383	0.0378	0.465643	0.376		STM2868		0.462957	0.0053	0.980102	0.772	0.487563	0.0197	1.48643	0.0935	0.402309	0.0321	1.20311	0.534	0.502165	0.00211	1.26662	0.00732		STM2868		0.877838	0.838	1.23498	0.157	1.94963	0.0541	3.48813	0.0716		STM2868		1.26662	0.00732	0.402309	0.00211	0.326914	0.000805	3.48813	0.0716	0.357005
STM2869_orgB		1.42498	0.0716	3.76002	0.0212	2.26933	0.277		STM2869_orgB		1.87344	0.0392	1.53034	0.112	1.11768	0.365	1.3385	0.0955	1.12489	0.673	1.2205	0.648	0.819098	0.356	1.66943	0.0111		STM2869_orgB		2.11989	0.608	1.36567	0.628	1.0571	0.923	0.331837	0.652		STM2869_orgB		1.66943	0.0111	1.12489	0.356	0.558729	0.00417	0.331837	0.652	0.311679
STM2870		2.87991	0.00134	3.02846	0.00135	0.416454	0.0263		STM2870		0.264523	8.62e-05	1.15231	0.112	0.311263	0.0174	0.743156	0.154	0.338547	0.0477	1.39716	0.469	0.6303	0.0342	1.42785	0.00688		STM2870		2.42559	0.0639	2.68464	0.0155	4.43508	0.00328	12.9191	0.00717		STM2870		1.42785	0.00688	0.338547	0.0342	0.187565	0.00358	12.9191	0.00717	0.935886
STM2880		8.05688	0.000985	4.56652	0.000745	0.390876	0.0263		STM2880		0.535488	0.00017	0.97384	0.669	0.190329	0.00944	1.03001	0.843	0.0990717	0.0283	2.28416	0.146	0.773519	0.544	2.97037	0.00685		STM2880		0.504971	0.297	0.354015	0.0677	1.99313	0.0785	11.4217	0.0193		STM2880		2.97037	0.00685	0.0990717	0.544	0.0865595	0.00098	11.4217	0.0193	1.33483
STM2891		1.86836	0.00742	1.03897	0.0149	0.975468	0.135		STM2891		0.373295	0.000691	0.938559	0.345	0.408017	0.0135	1.11565	0.843	0.443447	0.0283	1.40099	0.177	0.494473	0.0196	0.789843	0.0136		STM2891		0.549306	0.103	0.812333	0.781	3.19537	0.00971	4.52639	0.0452		STM2891		0.789843	0.0136	0.443447	0.0196	0.366213	0.0014	4.52639	0.0452	0.510871
[truncated: 61 more columns]
